# Supplementary material for: Sustained Release of Tacrolimus Embedded in a Mixed Thermosensitive Hydrogel for Improving Functional Recovery of Injured Peripheral Nerves in Extremities
Source: MDPI journal article supplement (doi:10.3390/pharmaceutics15020508), 2023-02-03
Supplement: s1 [file s1]

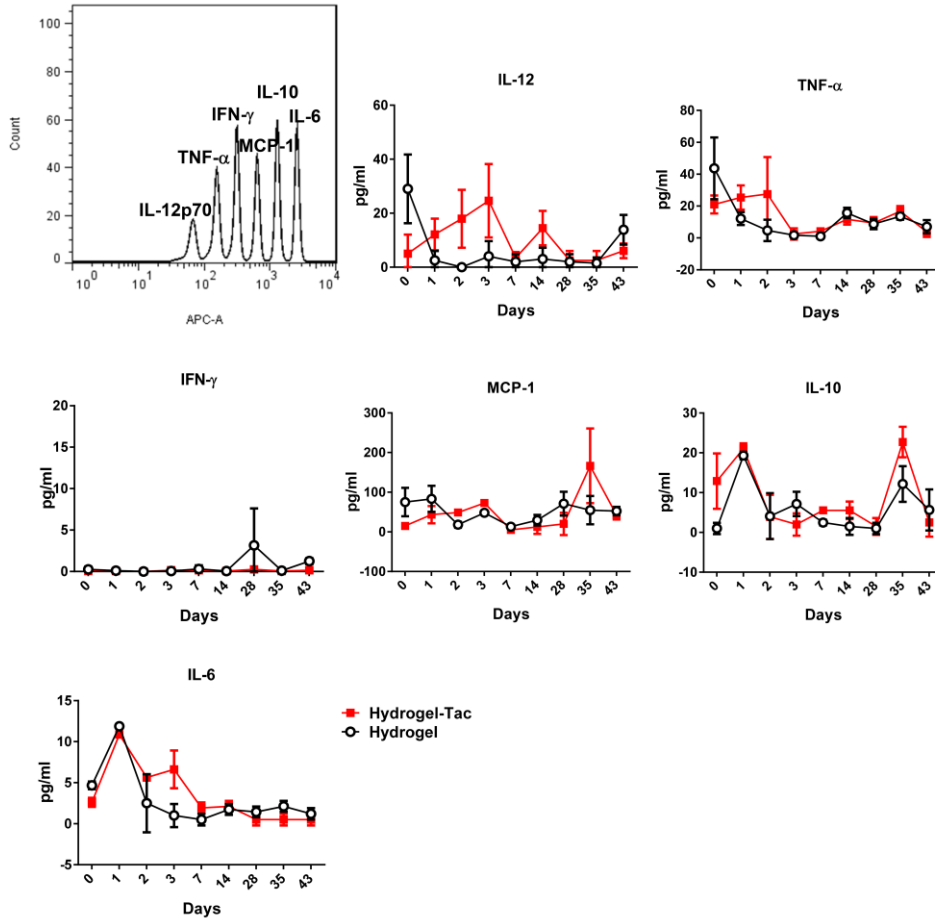

**Supplementary Figure S1. Cytokine profiles in peripheral blood serum, assessed using cytometric bead array assay.**

At different time points, blood serum samples were harvested from mice treated with one subcutaneous injection of 0.1 ml of hydrogel or Hydrogel-Tac (2 mg/ml). The concentrations of pro-inflammatory cytokines such as interleukin (IL)-12, IL-6, tumor necrosis factor-alpha (TNF- $\alpha$ , interferon (IFN)- $\gamma$ , anti-inflammatory IL-10 cytokine, and chemokine monocyte chemoattractant protein-1 (MCP-1) were examined via cytometric bead array (CBA) assay using flow cytometry. The figure in the upper left displays various cytokine levels examined using flow cytometry. Various cytokine concentrations (pg/ml) were calculated according to the standard curve using FCAP Array multiplex analysis software. Each group had three mice. Mean  $\pm$  SD was used to represent the statistical data.
